# Supplementary material for: De Novo p.Asp3368Gly Variant of Dystrophin Gene Associated with X-Linked Dilated Cardiomyopathy and Skeletal Myopathy: Clinical Features and In Silico Analysis
Source: MDPI journal article supplement (doi:10.3390/ijms25052787), 2024-02-28
Supplement: s1 [file s1]

## S1. Gene list associated to Dilated Cardiomyopathy

RYR2, HFE, FHL1, SLC40A1, FHL2, PRKAG2, ILK, LDB3, TAZ, MPO, MYPN, SYNE2, SYNE1, CSRP3, SGCD, TMEM43, SGCB, HJV, PPP1R13L, LAMP2, NPPA, GATAD1, ANKRD1, EPG5, SCN5A, EMD, SCN1B, TMPO, MYBPC3, DSP, ACTN2, TNNC1, TPM1, ABCC9, SDHA, ACTA1, TFR2, MYL2, TNNT2, MYL3, PKP2, RBM20, DSG2, CRYAB, VCL, DSC2, MYH6, MYH7, CTF1, LAMA4, PSEN2, NEXN, PSEN1, TTN, PDLIM3, PLN, TTR, BAG3, PRDM16, LMNA, TNNT3, DMD, FLNC, NKX2-5, FKTN, DNAJC19, JUP, DMPK, NEBL, TXNRD2, IDH2, EYA4, CAVIN4, DOLK, XK, ACTC1, DES, RAB3GAP2, TCAP, HAMP, GLA.

## S2: List of rare variant passed filtering strategy.

| Ref.Seq     | SNP         | GENE   | cDNA variant          | Protein alteration | Variant type         | Prediction    |
|-------------|-------------|--------|-----------------------|--------------------|----------------------|---------------|
| NM_182961.3 | rs770713708 | SYNE1  | c.2543G>C             | p.(Ser848Thr)      | Missense             | VUS           |
| NM_182961.3 |             | SYNE1  | c.23020-3T            |                    | Splice region Intron | VUS           |
| NM_004387.3 | rs763099269 | NKX2-5 | c.335-297del          |                    | Intron               | Benign        |
| NM_198056.2 | rs41258454  | SCN5A  | c.3511+10C>T          |                    | Intron               | Likely Benign |
| NM_000116.4 | rs113130344 | TAZ    | c.-88G>C              |                    | 5-prime UTR          | Likely Benign |
| NM_004415.3 | rs142494121 | DSP    | c.2723G>A             | Arg908His          | Missense             | Likely Benign |
| NM_000117.2 | rs139983160 | EMD    | c.428C>T              | p.(Ser143Phe)      | Missense             | Likely Benign |
| NM_182914.2 | rs769211907 | SYNE2  | c.788-7C>G            |                    | Splice region Intron | Likely Benign |
| NM_182961.3 | rs886044642 | SYNE1  | c.17203-5C>T          |                    | Splice region Intron | Benign        |
| NM_182961.3 | rs35379711  | SYNE1  | c.9489A>G             | Gln3163=           | Synonymous           | Likely Benign |
| NM_002290.4 | rs71543223  | LAMA4  | c.827_828delinsA<br>C | p.(Asp276=)        | Synonymous           | Benign        |
| NM_014000.2 | rs71579355  | VCL    | c.1317T>C             | p.(Ser439=)        | Synonymous           | Benign        |
| NM_182961.3 | rs141671123 | SYNE1  | c.6339T>C             | p.(Thr2113=)       | Synonymous           | Likely Benign |
